# Supplementary material for: Incorporating 131I into a PAMAM (G5.0) dendrimer-conjugate: design of a theranostic nanosensor for medullary thyroid carcinoma
Source: Royal Society of Chemistry journal article supplement (doi:10.1039/c7ra00604g), 2017-01-01
Supplement: c7ra00604g1.pdf [file c7ra00604g1.pdf]

## Incorporating $^{131}\text{I}$ into a PAMAM (G5.0) Dendrimer-conjugate: Design of a Theranostic Nanosensor for Medullary Thyroid Carcinoma

Rui He<sup>1</sup>, Hongwang Wang<sup>2</sup>, Yuling Su<sup>1</sup>, Cuihua Chen<sup>1</sup>, Lijun Xie<sup>1</sup>, Lilin Chen<sup>1</sup>, Jing Yu<sup>2</sup>,  
Yubisela Toledo<sup>1</sup>, Gayani S. Abayaweera<sup>1</sup>, Gaohong Zhu<sup>1\*</sup>, Stefan H. Bossmann<sup>2\*</sup>

<sup>1</sup> Department of Nuclear Medicine, First Affiliated Hospital of Kunming Medical University, Kunming, 650032, China

<sup>2</sup> Department of Chemistry, Kansas State University, Manhattan, KS, USA

(Corresponding authors :Gaohong Zhu, email: [1026909611@qq.com](mailto:1026909611@qq.com), Stefan H. Bossmann, email: [sbossman@ksu.edu](mailto:sbossman@ksu.edu))

### Supplementary Information

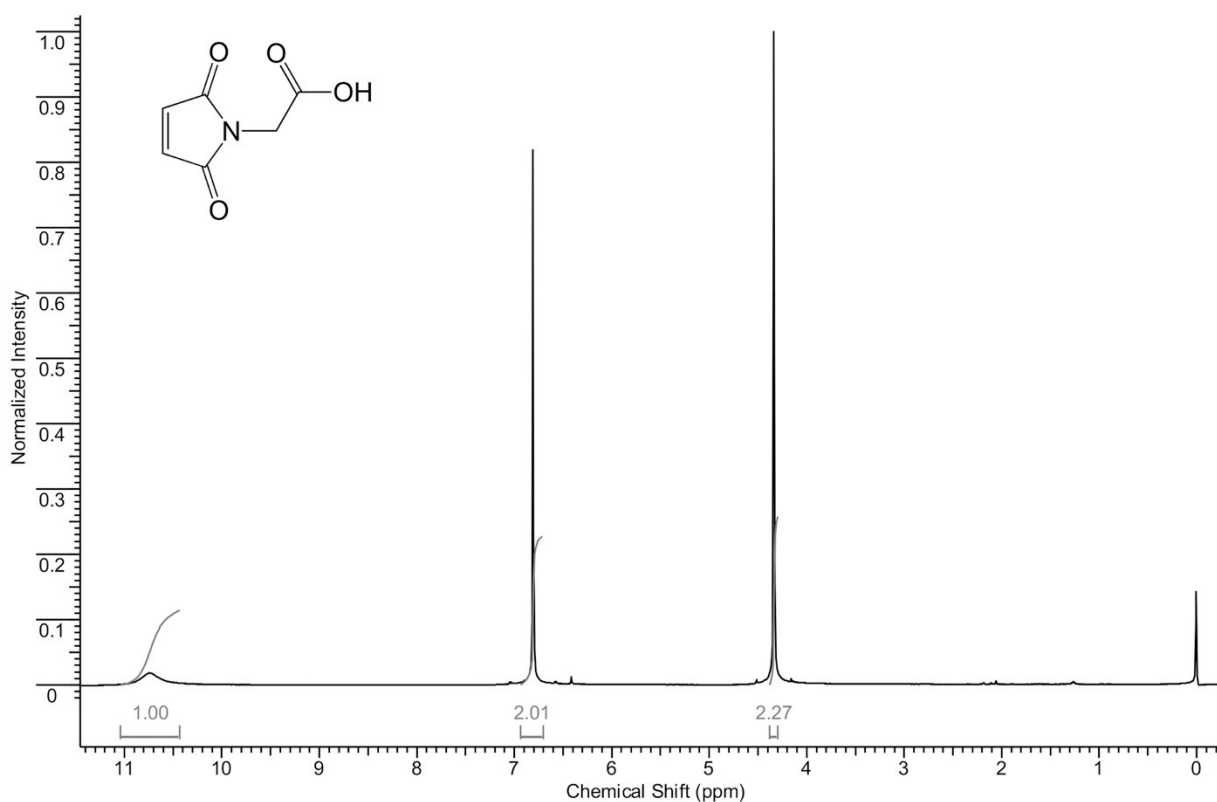

Figure S1:  $^1\text{H-NMR}$  spectrum (Varian, 400MHz) of the maleimide linker used in this study.

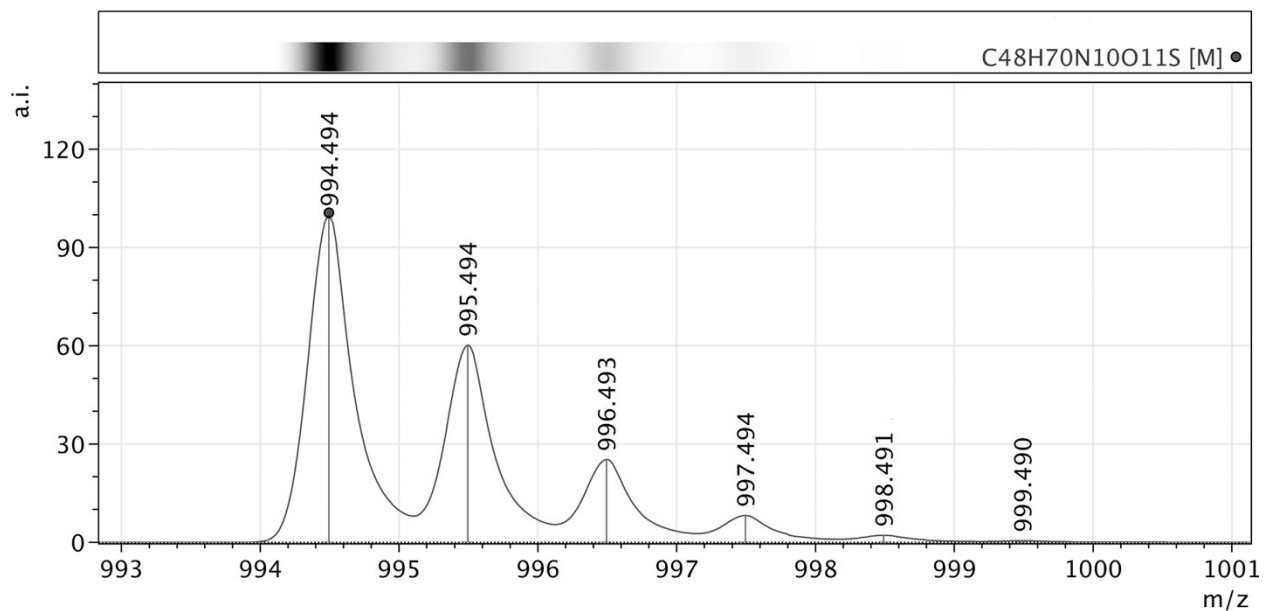

Figure S2: MALDI-TOF of KYKYKYC (M+ peak).

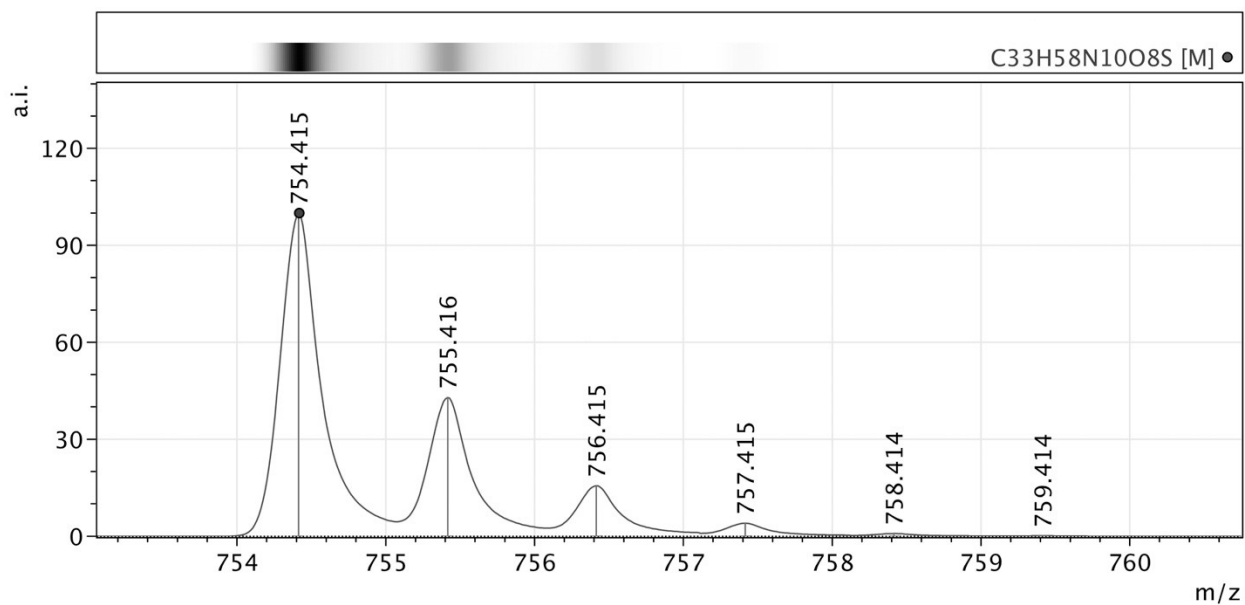

Figure S3: MALDI-TOF of GPLPLRC (M+ peak).

## How many $^{131}\text{I}$ atoms are bonded to each PAMAM Starburst dendrimer?

1) How many  $^{131}\text{I}$  atoms are present in a 3mCi Na  $^{131}\text{I}$ ?

The **Curie** is defined as  $3.7 \cdot 10^{10} \text{ s}^{-1}$ , or 37 GBq.  $3 \text{ mCi} = 1.11 \times 10^8 \text{ s}^{-1}$ .

The decay constant  $\lambda$  of  $^{131}\text{I}$  is  $9.94 \times 10^{-7} \text{ s}^{-1}$ .

The rate of decay is defined as:

$$-\frac{dN}{dt} = \lambda N = 9.94 \times 10^{-7} \text{ s}^{-1} \times N$$

$N = 1.1167 \times 10^{14}$   $^{131}\text{I}$  atoms. This corresponds to  $1.8544 \times 10^{-10}$  moles of  $^{131}\text{I}$  atoms.

The molecular weight of PAMAM G5.0 is  $28,826 \text{ g mol}^{-1}$ . According to our ICP analysis, each dendrimer is linked to 18 units of KYKYKYC ( $995.20 \text{ g mol}^{-1}$  per unit). Furthermore, G5.0-VTP is additionally linked to 9 units of GPLPLRC ( $754.95 \text{ g mol}^{-1}$  per unit).

Therefore, the molecular weights of the functionalized dendrimers are:

G5.0:  $(28,826 + 18 \times 995.20) \text{ g mol}^{-1} = 46,739.6 \text{ g mol}^{-1}$ .

G5.0-VTP:  $(28,826 + 18 \times 995.20 + 9 \times 754.95) \text{ g mol}^{-1} = 53,534.15 \text{ g mol}^{-1}$ .

10 micrograms of G5.0 =  $2.139 \times 10^{-10}$  moles

10 micrograms of G5.0-VTP =  $1.868 \times 10^{-10}$  moles

According to our experimental design, the maximal labeling degrees are:

G5.0:  $1.8544 \times 10^{-10}$  moles of  $^{131}\text{I}$  atoms /  $2.139 \times 10^{-10}$  moles = 0.87

G5.0-VTP:  $1.8544 \times 10^{-10}$  moles of  $^{131}\text{I}$  atoms /  $1.868 \times 10^{-10}$  moles = 0.99.

When considering the obtained labelling rates of  $93 \pm 1\%$  and  $85 \pm 2\%$ , respectively, each mole of G5.0 was chemically linked to 0.81 moles of  $^{131}\text{I}$ , whereas each mole of G5.0-VTP was coupled to 0.84 moles of  $^{131}\text{I}$ .

Reference:

CRC Handbook of Chemistry and Physics, 86th Edition, edited by David R. Lide (National Institute of Standards and Technology). CRC Press (an imprint of Taylor and Francis Group): Boca Raton, FL. 2005. 2544 pp. ISBN 0-8493-0486-5.
